# Supplementary figures and images for: Coligand effects on the architectures and magnetic properties of octahedral cobalt(ii) complexes with easy-axis magnetic anisotropy
Source: Royal Society of Chemistry journal article supplement (doi:10.1039/c9ce01871a), 2020-01-01

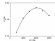

Supplement: c9ce01871a6.pdf [file c9ce01871a6.pdf]
